# Supplementary material for: Synthesis of Vinyl-Containing Polydimethylsiloxane in An Active Medium
Source: MDPI journal article supplement (doi:10.3390/polym16020257), 2024-01-16
Supplement: s1 [file s1]

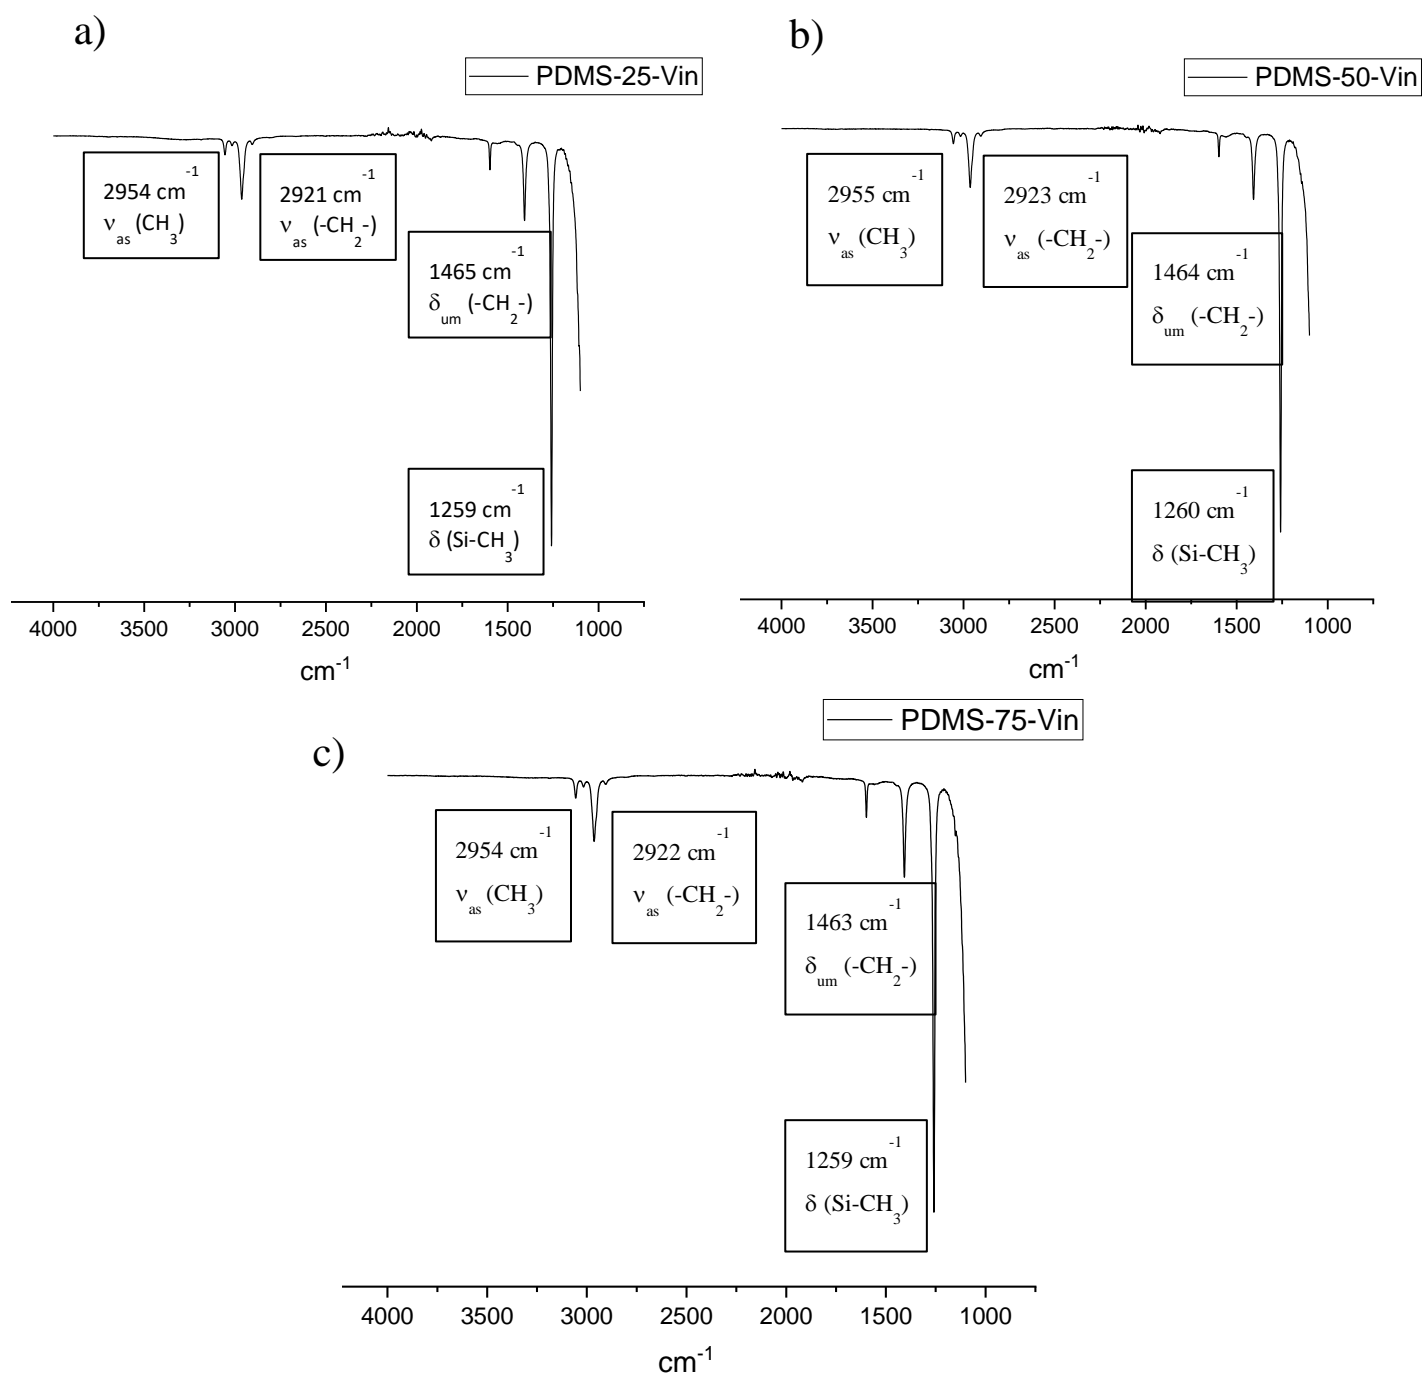

**Figure S1.** IR spectra of the blocking products

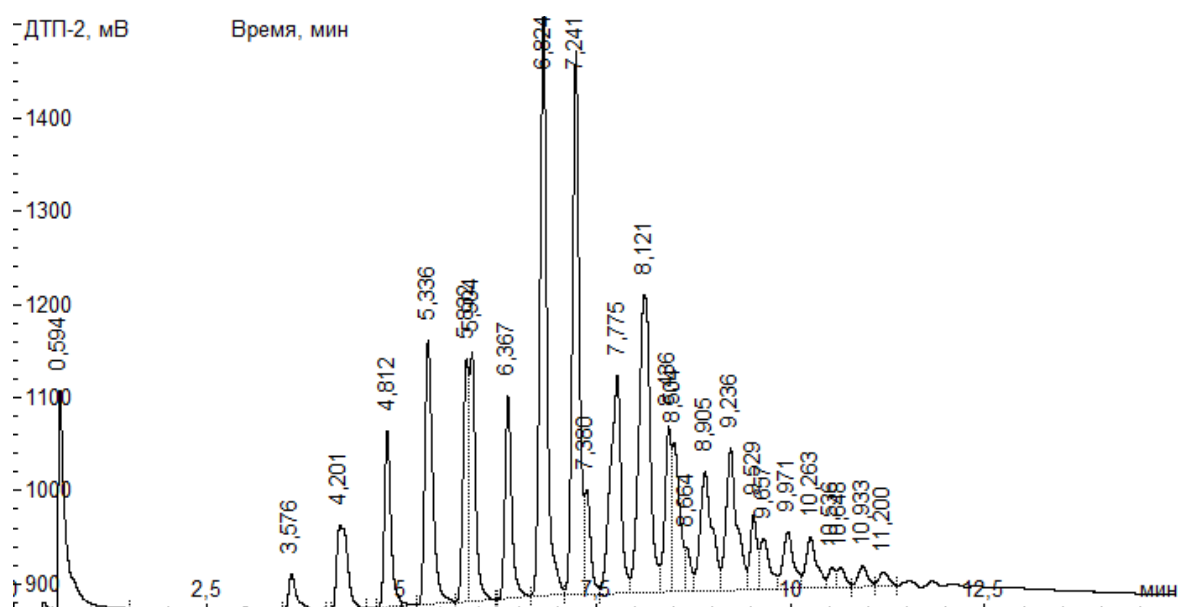

**Figure S2. GLC of volatile products**

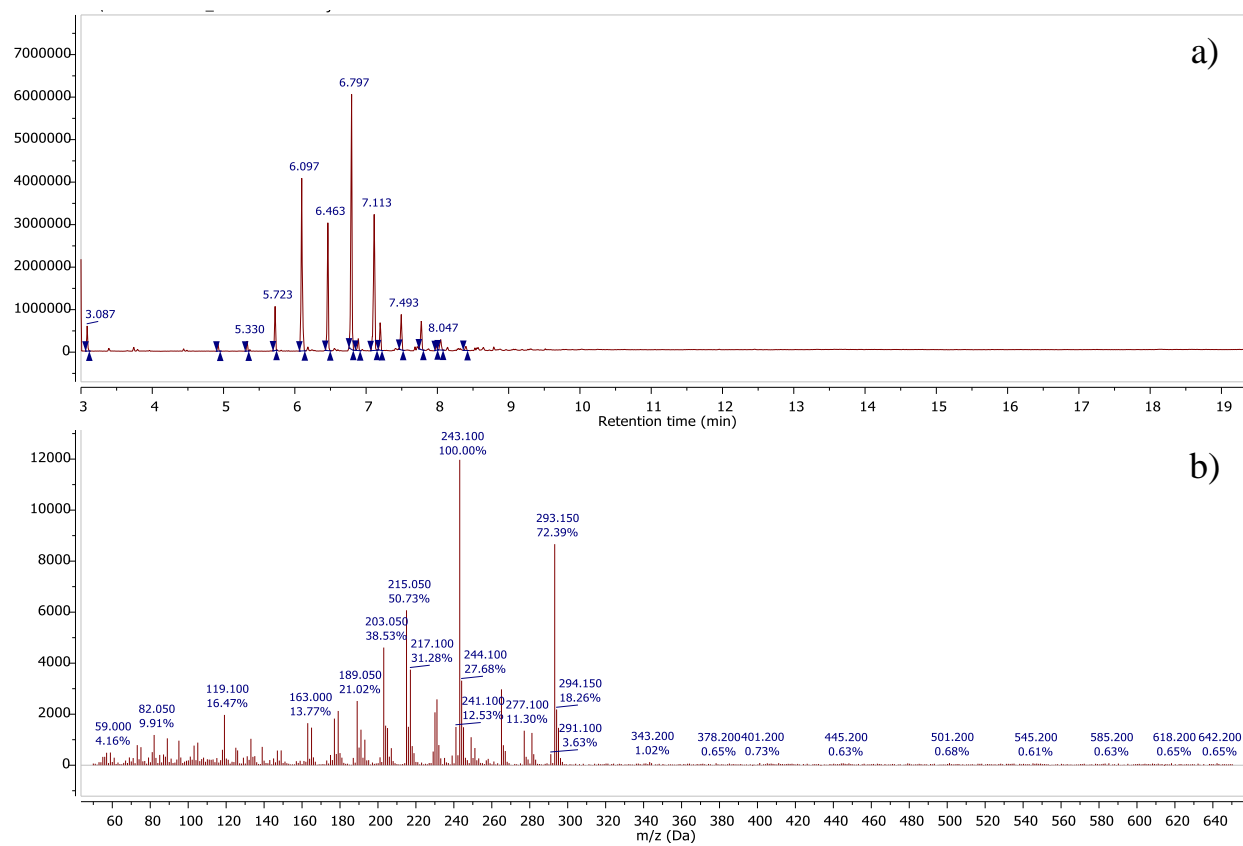

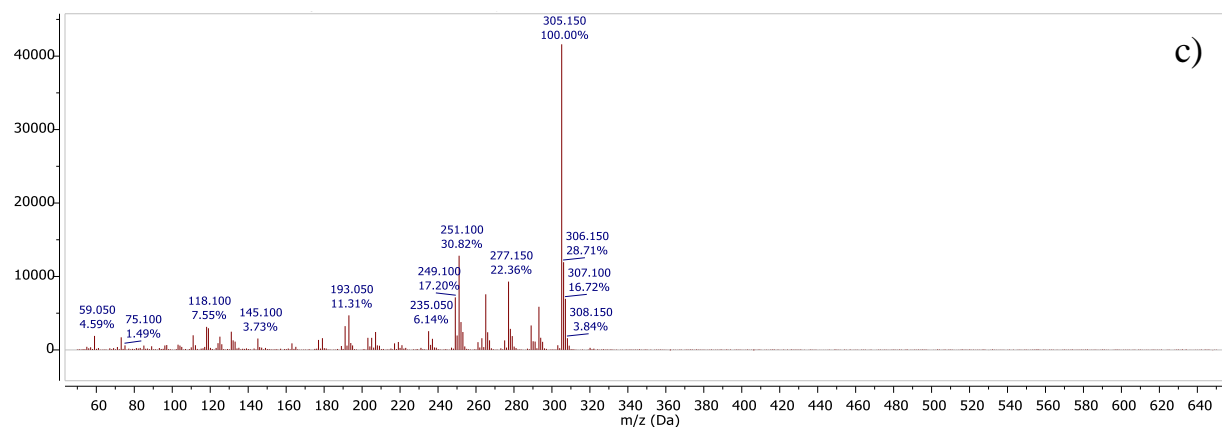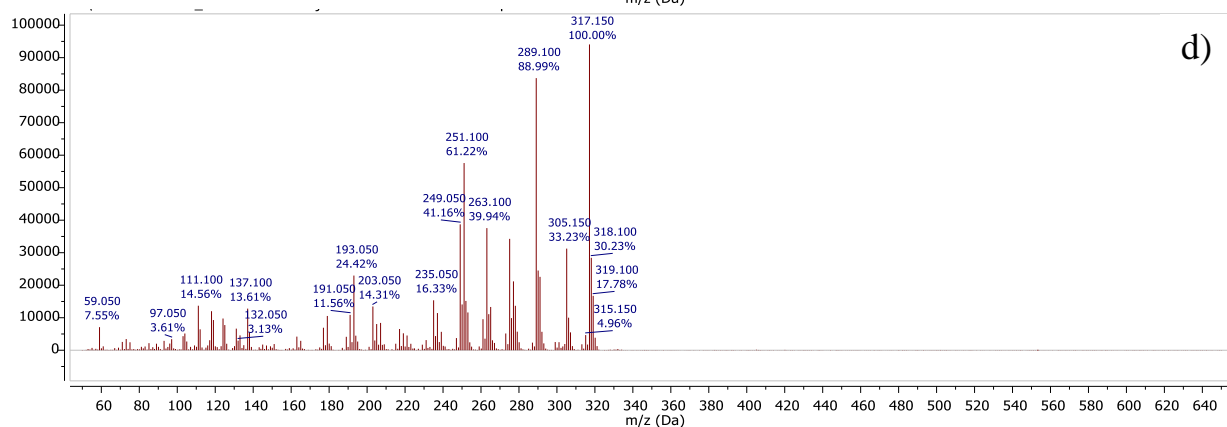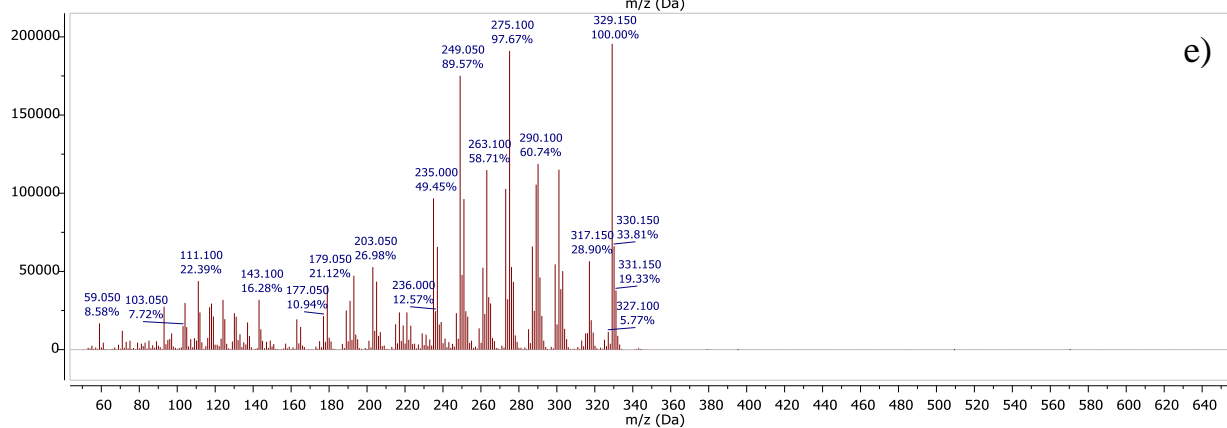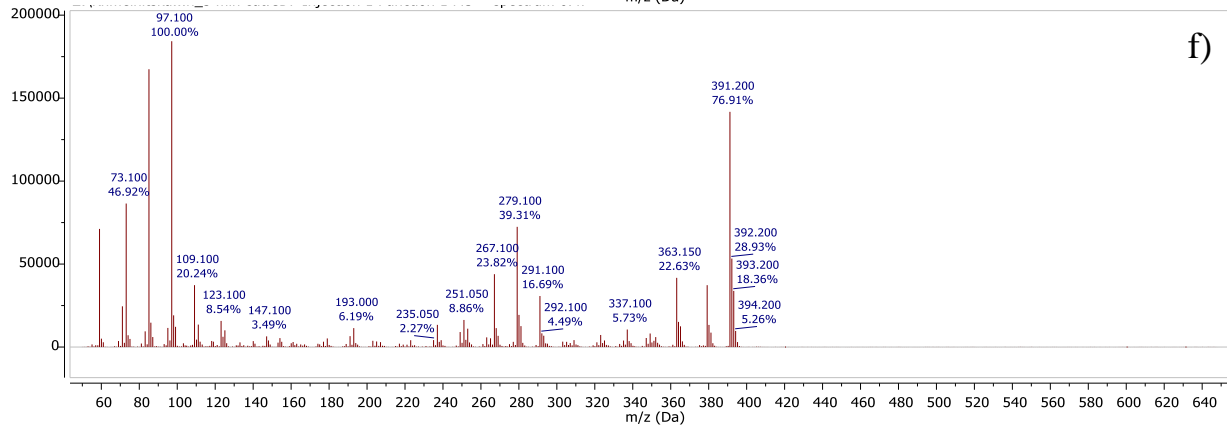

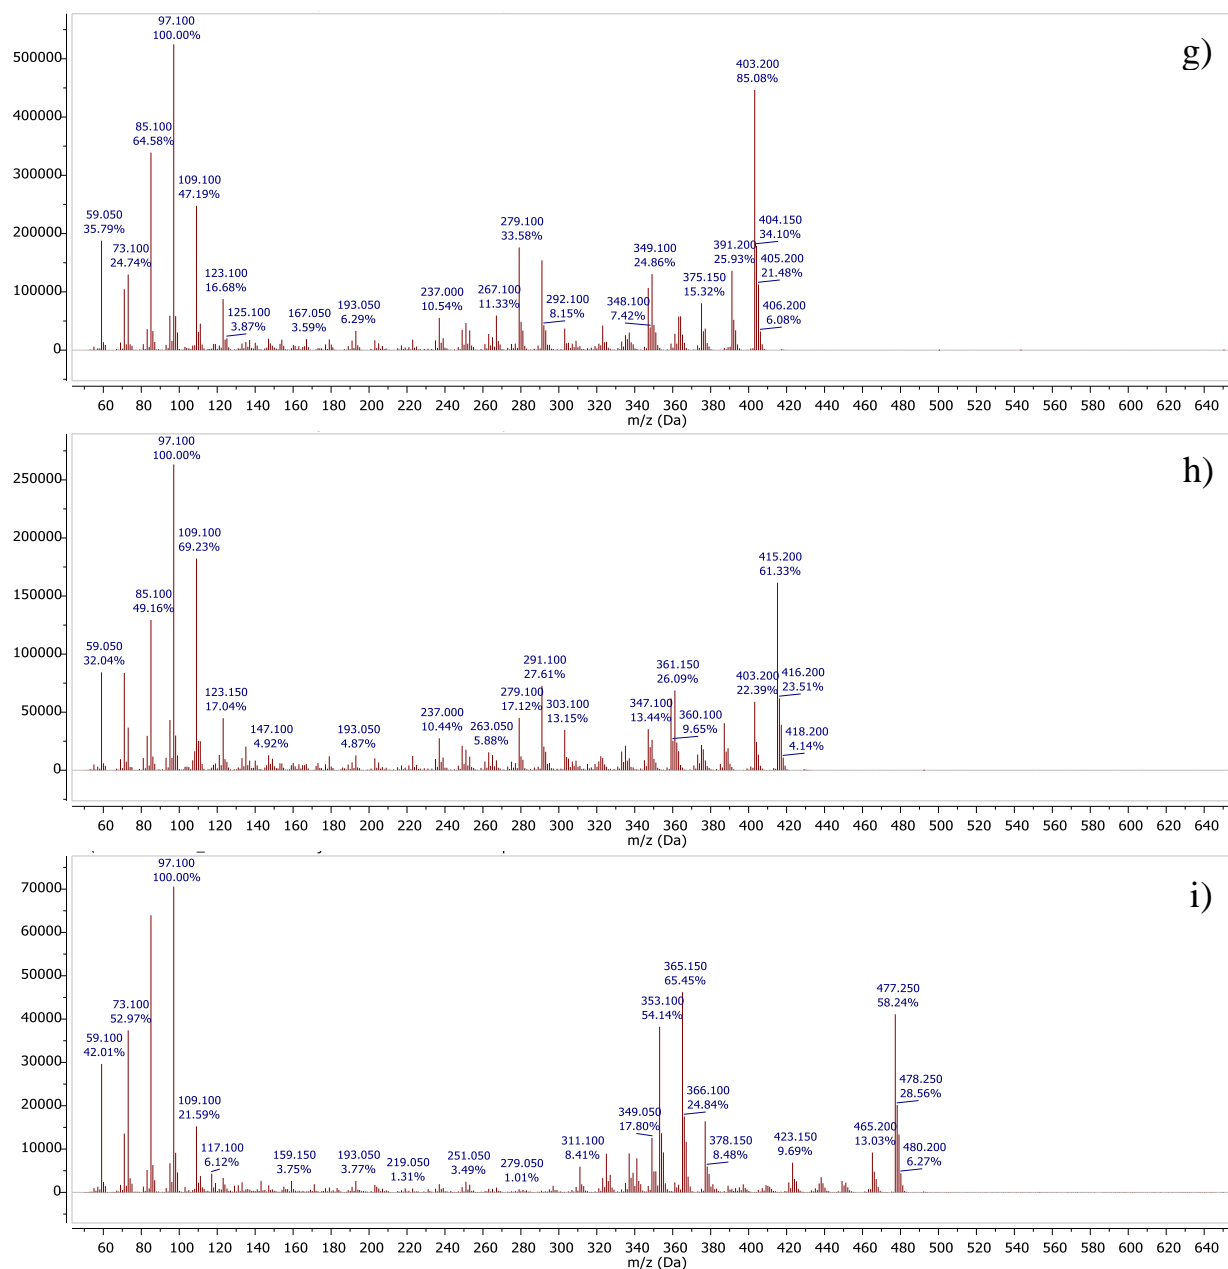

**Figure S3.** GC-MS spectrum of volatile products PDMS-75-Vin: a) general spectra, b) at 4.920 min, c) at 5.330 min, d) at 5.723 min, e) at 6.097 min, f) at 6.463 min, g) at 6.797 min, h) at 7.113 min, i) at 7.493 min

**Table S1.** Characteristics of cyclosilcosanes

| № | m/z                                                                                  | Cycle                         | MM  | Scheme                                                                                | Boiling point, °C |
|---|--------------------------------------------------------------------------------------|-------------------------------|-----|---------------------------------------------------------------------------------------|-------------------|
| 1 | 219<br>[Si <sub>3</sub> O <sub>3</sub> C <sub>5</sub> H <sub>15</sub> ] <sup>+</sup> | D <sub>3</sub>                | 234 | 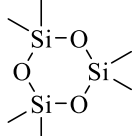 | 134               |
| 2 | 213<br>[Si <sub>3</sub> O <sub>3</sub> C <sub>6</sub> H <sub>15</sub> ] <sup>+</sup> | D <sub>2</sub> V <sub>1</sub> | 234 |  | 160               |

|    |                                                                                       |                               |     |                                                                                       |          |
|----|---------------------------------------------------------------------------------------|-------------------------------|-----|---------------------------------------------------------------------------------------|----------|
| 3  | 231<br>[Si <sub>3</sub> O <sub>3</sub> C <sub>7</sub> H <sub>15</sub> ] <sup>+</sup>  | D <sub>1</sub> V <sub>2</sub> | 246 | 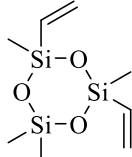   | 185.6±13 |
| 4  | 281<br>[Si <sub>4</sub> O <sub>4</sub> C <sub>7</sub> H <sub>21</sub> ] <sup>+</sup>  | D <sub>4</sub>                | 296 |    | 175      |
| 5  | 293<br>[Si <sub>4</sub> O <sub>4</sub> C <sub>8</sub> H <sub>21</sub> ] <sup>+</sup>  | D <sub>3</sub> V <sub>1</sub> | 308 |    | 180      |
| 6  | 305<br>[Si <sub>4</sub> O <sub>4</sub> C <sub>9</sub> H <sub>21</sub> ] <sup>+</sup>  | D <sub>2</sub> V <sub>2</sub> | 320 |    | 219.9±23 |
| 7  | 317<br>[Si <sub>4</sub> O <sub>4</sub> C <sub>10</sub> H <sub>21</sub> ] <sup>+</sup> | D <sub>1</sub> V <sub>3</sub> | 332 |   | 234±23   |
| 8  | 329<br>[Si <sub>4</sub> O <sub>4</sub> C <sub>11</sub> H <sub>21</sub> ] <sup>+</sup> | V <sub>4</sub>                | 344 |  | 224      |
| 9  | 355<br>[Si <sub>5</sub> O <sub>5</sub> C <sub>9</sub> H <sub>27</sub> ] <sup>+</sup>  | D <sub>5</sub>                | 370 |  | 210      |
| 10 | 367<br>[Si <sub>5</sub> O <sub>5</sub> C <sub>10</sub> H <sub>27</sub> ] <sup>+</sup> | D <sub>4</sub> V <sub>1</sub> | 382 |  | 257.5±23 |
| 11 | 379<br>[Si <sub>5</sub> O <sub>5</sub> C <sub>11</sub> H <sub>27</sub> ] <sup>+</sup> | D <sub>3</sub> V <sub>2</sub> | 394 |  | 270.4±23 |

|    |                                                                                       |                               |     |  |          |
|----|---------------------------------------------------------------------------------------|-------------------------------|-----|--|----------|
| 12 | 391<br>[Si <sub>5</sub> O <sub>5</sub> C <sub>12</sub> H <sub>27</sub> ] <sup>+</sup> | D <sub>2</sub> V <sub>3</sub> | 406 |  | 283,1±23 |
| 13 | 403<br>[Si <sub>5</sub> O <sub>5</sub> C <sub>13</sub> H <sub>27</sub> ] <sup>+</sup> | D <sub>1</sub> V <sub>4</sub> | 418 |  | 295.6±23 |
| 14 | 415<br>[Si <sub>5</sub> O <sub>5</sub> C <sub>14</sub> H <sub>27</sub> ] <sup>+</sup> | V <sub>5</sub>                | 430 |  | 261-262  |
| 15 | 429<br>[Si <sub>6</sub> O <sub>6</sub> C <sub>11</sub> H <sub>33</sub> ] <sup>+</sup> | D <sub>6</sub>                | 444 |  | 245      |
| 16 | 441<br>[Si <sub>6</sub> O <sub>6</sub> C <sub>12</sub> H <sub>33</sub> ] <sup>+</sup> | D <sub>5</sub> V <sub>1</sub> | 456 |  | 304.5±25 |
| 17 | 453<br>[Si <sub>6</sub> O <sub>6</sub> C <sub>13</sub> H <sub>33</sub> ] <sup>+</sup> | D <sub>4</sub> V <sub>2</sub> | 468 |  | -        |
| 18 | 465<br>[Si <sub>6</sub> O <sub>6</sub> C <sub>14</sub> H <sub>33</sub> ] <sup>+</sup> | D <sub>3</sub> V <sub>3</sub> | 480 |  | -        |
| 19 | 477<br>[Si <sub>6</sub> O <sub>6</sub> C <sub>15</sub> H <sub>33</sub> ] <sup>+</sup> | D <sub>2</sub> V <sub>4</sub> | 492 |  | -        |

|    |                                                                                       |                               |     |                                                                                      |     |
|----|---------------------------------------------------------------------------------------|-------------------------------|-----|--------------------------------------------------------------------------------------|-----|
| 20 | 489<br>[Si <sub>6</sub> O <sub>6</sub> C <sub>16</sub> H <sub>33</sub> ] <sup>+</sup> | D <sub>1</sub> V <sub>5</sub> | 504 | 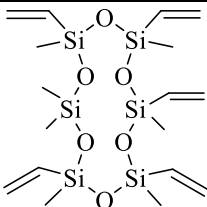   | -   |
| 21 | 501<br>[Si <sub>6</sub> O <sub>6</sub> C <sub>17</sub> H <sub>33</sub> ] <sup>+</sup> | V <sub>6</sub>                | 516 |    | 320 |
| 22 | 503<br>[Si <sub>7</sub> O <sub>7</sub> C <sub>13</sub> H <sub>39</sub> ] <sup>+</sup> | D <sub>7</sub>                | 518 |   | 336 |
| 23 | 515<br>[Si <sub>7</sub> O <sub>7</sub> C <sub>14</sub> H <sub>39</sub> ] <sup>+</sup> | D <sub>6</sub> V <sub>1</sub> | 530 |   | -   |
| 24 | 527<br>[Si <sub>7</sub> O <sub>7</sub> C <sub>15</sub> H <sub>39</sub> ] <sup>+</sup> | D <sub>5</sub> V <sub>2</sub> | 542 |  | -   |

**Table S2. Detailed composition of cycles**

| Characteristics |                                                                     |                                      |                |                |                |                  |                               |                               |                               |                               |                               |                               |                               |                               |                               |                               |                               |                               |                               |                               |                               |                               |                                                                              |      |      |      |     |
|-----------------|---------------------------------------------------------------------|--------------------------------------|----------------|----------------|----------------|------------------|-------------------------------|-------------------------------|-------------------------------|-------------------------------|-------------------------------|-------------------------------|-------------------------------|-------------------------------|-------------------------------|-------------------------------|-------------------------------|-------------------------------|-------------------------------|-------------------------------|-------------------------------|-------------------------------|------------------------------------------------------------------------------|------|------|------|-----|
| №               | MeVinSi(OMe) <sub>2</sub> /<br>Me <sub>2</sub> Si(OEt) <sub>2</sub> | Composition of cyclosiloxanes, wt. % |                |                |                |                  |                               |                               |                               |                               |                               |                               |                               |                               |                               |                               |                               |                               |                               |                               |                               |                               |                                                                              |      |      |      |     |
|                 |                                                                     | D <sub>3</sub>                       | D <sub>4</sub> | D <sub>5</sub> | D <sub>6</sub> | D <sub>n+1</sub> | 3 links                       |                               | 4 links                       |                               |                               | 5 links                       |                               |                               |                               | 6 links                       |                               |                               |                               |                               | 7 links                       |                               | V <sub>3</sub> V <sub>4</sub> V <sub>5</sub> V <sub>6</sub> V <sub>n+1</sub> |      |      |      |     |
|                 |                                                                     |                                      |                |                |                |                  | D <sub>2</sub> V <sub>1</sub> | D <sub>1</sub> V <sub>2</sub> | D <sub>3</sub> V <sub>1</sub> | D <sub>2</sub> V <sub>2</sub> | D <sub>1</sub> V <sub>3</sub> | D <sub>4</sub> V <sub>1</sub> | D <sub>3</sub> V <sub>2</sub> | D <sub>2</sub> V <sub>3</sub> | D <sub>1</sub> V <sub>4</sub> | D <sub>5</sub> V <sub>1</sub> | D <sub>4</sub> V <sub>2</sub> | D <sub>3</sub> V <sub>3</sub> | D <sub>2</sub> V <sub>4</sub> | D <sub>1</sub> V <sub>5</sub> | D <sub>6</sub> V <sub>1</sub> | D <sub>5</sub> V <sub>2</sub> |                                                                              |      |      |      |     |
| 1               | 100/0                                                               | -                                    | -              | -              | -              | -                | -                             | -                             | -                             | -                             | -                             | -                             | -                             | -                             | -                             | -                             | -                             | -                             | -                             | -                             | -                             | -                             | -                                                                            | 6,0  | 76,0 | 15,5 | 2,0 |
| 2               | 25/75                                                               | *                                    | 17,5           | 6,0            | 1,5            | *                | *                             | *                             | 31,0                          | 15,5                          | 2,5                           | 10,0                          | 7,0                           | 2,0                           | *                             | 2,5                           | 2,0                           | *                             | *                             | -                             | *                             | *                             | -                                                                            | -    | -    | -    | -   |
| 3               | 50/50                                                               | *                                    | 3,5            | *              | *              | -                | *                             | 1,5                           | 19,5                          | 30,0                          | 17,5                          | 4,0                           | 10,0                          | 6,5                           | 3,0                           | *                             | *                             | 1,0                           | *                             | *                             | -                             | *                             | -                                                                            | -    | *    | -    | -   |
| 4               | 75/25                                                               | -                                    | -              | -              | -              | -                | -                             | 1,5                           | 2,5                           | 15,0                          | 40,0                          | -                             | -                             | 3,0                           | 3,0                           | -                             | *                             | 1,5                           | 2,5                           | 2,5                           | -                             | -                             | -                                                                            | 23,0 | 5,5  | -    | -   |
| 5               | 100/0                                                               | -                                    | -              | -              | -              | -                | -                             | -                             | -                             | -                             | -                             | -                             | -                             | -                             | -                             | -                             | -                             | -                             | -                             | -                             | -                             | -                             | *                                                                            | 6,0  | 72,5 | 18,5 | 2,0 |
| 6               | 25/75                                                               | *                                    | 17,5           | 8,0            | 1,5            | *                | -                             | -                             | 23,5                          | 16,5                          | 4,0                           | 12,5                          | 8,0                           | 2,5                           | *                             | 2,5                           | 2,0                           | *                             | -                             | -                             | *                             | *                             | -                                                                            | -    | -    | -    | -   |
| 7               | 50/50                                                               | -                                    | 3,0            | *              | *              | -                | -                             | *                             | 18,0                          | 32,5                          | 20,5                          | 4,0                           | 9,5                           | 5,0                           | 1,0                           | *                             | *                             | *                             | *                             | -                             | -                             | -                             | -                                                                            | 3,5  | *    | -    | -   |
| 8               | 75/25                                                               | -                                    | -              | -              | -              | -                | -                             | -                             | 4,5                           | 17,5                          | 35,5                          | -                             | -                             | 3,5                           | 4,5                           | -                             | -                             | 1,5                           | 2,5                           | 1,5                           | -                             | -                             | -                                                                            | 19,5 | 9,5  | -    | -   |

\* ≤ 1
